# Supplementary material for: Genome-wide annotation of microRNA primary transcript structures reveals novel regulatory mechanisms
Source: PubMed Central journal article supplement — Genome Res. 2015 Sep;25(9):1401–9. doi: 10.1101/gr.193607.115 (PMC4561498; doi:10.1101/gr.193607.115), 2015-09
Supplement: supp_gr.193607.115_Supplemental_Tables.pdf [file supp_gr.193607.115_Supplemental_Tables.pdf]

**Table S1. Conserved miRNAs encoded by newly annotated pri-miRNAs.**

|                                                                     | <b>Illumina BodyMap 2.0</b>                                                                                                                                                          | <b>Human cell lines</b>                                                                                                                                                                                                                                                                                                                                                                                                                                                                                                                                                                 | <b>Mouse cell lines</b>                                                                                                                                                                                                                                                                                                                                                                                                                                                          |
|---------------------------------------------------------------------|--------------------------------------------------------------------------------------------------------------------------------------------------------------------------------------|-----------------------------------------------------------------------------------------------------------------------------------------------------------------------------------------------------------------------------------------------------------------------------------------------------------------------------------------------------------------------------------------------------------------------------------------------------------------------------------------------------------------------------------------------------------------------------------------|----------------------------------------------------------------------------------------------------------------------------------------------------------------------------------------------------------------------------------------------------------------------------------------------------------------------------------------------------------------------------------------------------------------------------------------------------------------------------------|
| <b>Class I</b><br>Independent noncoding transcription units         | miR-23a/24-2/27a <sup>b</sup><br>miR-101-1/3671<br>miR-141/200c <sup>b</sup><br>miR-142 <sup>a</sup><br>miR-193b/365a <sup>b</sup><br>miR-219-2 <sup>a</sup><br>miR-223 <sup>c</sup> | let-7a-1/7f-1/7d<br>let-7i<br>miR-10b<br>miR-23a/24-2/27a <sup>b</sup><br>miR-29c/29b-2<br>miR-30a/30c-2 <sup>b</sup><br>miR-30b/30d <sup>b</sup><br>miR-34a<br>miR-92b <sup>b</sup><br>miR-101-1/3671<br>miR-129-2<br>miR-130a<br>miR-130b/301b<br>miR-132/212 <sup>b</sup><br>miR-138-1<br>miR-141/200c <sup>b</sup><br>miR-144/451a/4732 <sup>b</sup><br>miR-146a/3142 <sup>b</sup><br>miR-148a <sup>b</sup><br>miR-187 <sup>b</sup><br>miR-192/194-2 <sup>b</sup><br>miR-193b/365a <sup>b</sup><br>miR-194-1/215<br>miR-200a/200b/429<br>miR-221/222<br>miR-302a/302b/302c/302d/367 | let-7a-1/7f-1/7d<br>let-7i<br>miR-7a-2<br>miR-17/18a/19a/20a/19b-1/92a-1<br>miR-31<br>miR-129-1 <sup>a</sup><br>miR-129-2<br>miR-130a<br>miR-133b/206 <sup>a</sup><br>miR-137<br>miR-138-1<br>miR-138-2 <sup>a</sup><br>miR-142 <sup>a</sup><br>miR-150 <sup>a</sup><br>miR-155<br>miR-191/425<br>miR-194-1/215<br>miR-199a-1 <sup>a</sup><br>miR-219-2 <sup>a</sup><br>miR-221/222<br>miR-302a/302b/302c/302d/367<br>miR-384<br>miR-670 <sup>a</sup><br>miR-3074-1 <sup>a</sup> |
| <b>Class II</b><br>Extension of existing protein-coding transcripts | miR-21<br>miR-505                                                                                                                                                                    | miR-7-2<br>miR-21<br>miR-34b/34c<br>miR-181c/181d <sup>b</sup><br>miR-196a-1<br>miR-219-1<br>miR-324<br>miR-505                                                                                                                                                                                                                                                                                                                                                                                                                                                                         | miR-10a<br>miR-34b/34c<br>miR-196a-1<br>miR-196a-2 <sup>a</sup><br>miR-196b<br>miR-200a/200b/429<br>miR-219-1<br>miR-320 <sup>a</sup><br>miR-324<br>miR-331 <sup>a</sup><br>miR-345 <sup>a</sup><br>miR-505                                                                                                                                                                                                                                                                      |
| <b>Class III</b><br>Extension of existing non-coding transcripts    | miR-29a/29b-1<br>miR-370                                                                                                                                                             | let-7e/miR-99b/miR-125a<br>miR-9-3<br>miR-29a/29b-1<br>miR-296/298<br>miR-370                                                                                                                                                                                                                                                                                                                                                                                                                                                                                                           | let-7e/miR-99b/miR-125a<br>miR-9-2<br>miR-18b/19b-2/20b/92a-2/106a/363 <sup>a</sup><br>miR-29a/29b-1<br>miR-296/298                                                                                                                                                                                                                                                                                                                                                              |

<sup>a</sup>not mapped in human cell lines

<sup>b</sup>not mapped in mouse cell lines

<sup>c</sup>not mapped in human and mouse cell lines

**Table S2.** Evaluation of the performance of four transcriptome assembly programs on pri-miRNAs that are annotated in Refseq.

| <b>Program</b> | <b>Number of predicted pri-miRNA transcripts matching the RefSeq annotation</b> | <b>Number of RefSeq pri-miRNAs for which at least one transcript was assembled correctly by the program</b> | <b>Running Time (hours:minutes:seconds)</b> |
|----------------|---------------------------------------------------------------------------------|-------------------------------------------------------------------------------------------------------------|---------------------------------------------|
| StringTie      | 561                                                                             | 467                                                                                                         | 1:13:23                                     |
| Cufflinks      | 378                                                                             | 337                                                                                                         | 21:01:08                                    |
| IsoLasso       | 90                                                                              | 82                                                                                                          | 14:36:04                                    |
| Scripture      | 293                                                                             | 200                                                                                                         | 65:57:32                                    |

Note: There are 788 Refseq genes (1836 transcripts) that overlap 876 miRNAs annotated in miRBase release 20 (out of 1871 total miRNAs).

**Table S3. RNAseq mapping statistics.**

|              | <b>Cell type</b> | <b>Read count</b> | <b>Mapping frequency</b> |
|--------------|------------------|-------------------|--------------------------|
| <b>Human</b> | A172             | 184,705,740       | 92.50%                   |
|              | A673             | 174,578,382       | 93.40%                   |
|              | Fibroblast       | 142,718,780       | 92.20%                   |
|              | HCT116           | 150,638,560       | 90.20%                   |
|              | HEK293           | 193,346,087       | 86.70%                   |
|              | HepG2            | 221,060,288       | 91.10%                   |
|              | MCF7             | 160,067,256       | 91.00%                   |
|              | NCCIT            | 165,209,310       | 93.30%                   |
| <b>Mouse</b> | C2C12            | 163,248,130       | 92.50%                   |
|              | CT-26            | 215,970,827       | 90.90%                   |
|              | E14TG2a          | 211,111,824       | 91.00%                   |
|              | Hepa1-6          | 150,418,313       | 93.40%                   |
|              | MEF              | 200,927,640       | 90.20%                   |
|              | Neuro-2a         | 193,572,149       | 89.50%                   |

**Table S4. Novel potential regulatory mechanisms for conserved human non-protein coding pri-miRNAs.**

| Encoded human miRNA(s)                             | Multiple promoters | Partial production of cluster | miRNA spans splice site |
|----------------------------------------------------|--------------------|-------------------------------|-------------------------|
| let-7a-1/let-7f-1/let-7d                           | Yes                |                               |                         |
| let-7a-3/let-7b                                    | Yes                |                               |                         |
| let-7c/miR-99a/miR-125b-2                          | Yes                |                               |                         |
| miR-9-2                                            | Yes                |                               |                         |
| miR-9-3                                            | Yes                |                               |                         |
| miR-15a/miR-16-1                                   | Yes                |                               |                         |
| miR-17/miR-18a/miR-19a/miR-20a/miR-19b-1/miR-92a-1 | Yes                |                               |                         |
| miR-22                                             | Yes                |                               |                         |
| miR-23a/miR-24-2/miR-27a                           | Yes                |                               |                         |
| miR-29a/miR-29b-1                                  | Yes                |                               |                         |
| miR-30b/miR-30d                                    | Yes                |                               |                         |
| miR-31                                             | Yes                |                               |                         |
| miR-101-1/miR-3671                                 | Yes                |                               |                         |
| miR-130a                                           | Yes                |                               |                         |
| miR-135a-2/miR-1251                                | Yes                |                               |                         |
| miR-135b                                           | Yes                |                               |                         |
| miR-137/miR-2682                                   | Yes                |                               |                         |
| miR-181c/miR-181d                                  | Yes                |                               |                         |
| miR-193b/miR-365a                                  | Yes                |                               |                         |
| miR-195/miR-497                                    | Yes                |                               |                         |
| miR-221/miR-222                                    | Yes                |                               |                         |
| miR-675                                            | Yes                |                               |                         |
| let-7a-2/miR-100/miR-125b-1                        | Yes                | Yes                           |                         |
| miR-30a/miR-30c-2                                  | Yes                | Yes                           |                         |
| miR-374a/miR-374b/miR-421/miR-545                  | Yes                | Yes                           |                         |
| miR-132/miR-212                                    |                    | Yes                           |                         |
| miR-130b/miR-301b                                  |                    |                               | Yes (miR-130b)          |
| miR-199a-2/miR-214                                 |                    |                               | Yes (miR-199a-2)        |
| miR-202                                            |                    |                               | Yes                     |
| miR-205                                            |                    |                               | Yes                     |

**Table S5. Novel potential regulatory mechanisms for conserved mouse non-protein coding pri-miRNAs.**

| <b>Encoded mouse miRNA(s)</b>                      | <b>Multiple promoters</b> | <b>Partial production of cluster</b> | <b>miRNA spans splice site</b> |
|----------------------------------------------------|---------------------------|--------------------------------------|--------------------------------|
| let-7b/let-7c-2                                    | Yes                       |                                      |                                |
| miR-15a/miR-16-1                                   | Yes                       |                                      |                                |
| miR-17/miR-18a/miR-19a/miR-20a/miR-19b-1/miR-92a-1 | Yes                       |                                      |                                |
| miR-29a/miR-29b-1                                  | Yes                       |                                      |                                |
| miR-31                                             | Yes                       |                                      |                                |
| miR-101a                                           | Yes                       |                                      |                                |
| miR-196b                                           | Yes                       |                                      |                                |
| miR-221/miR-222                                    | Yes                       |                                      |                                |
| miR-345                                            | Yes                       |                                      |                                |
| miR-374/miR-421                                    | Yes                       |                                      |                                |
| let-7a-2/miR-100/miR-125b-1                        | Yes                       | Yes                                  |                                |
| miR-670                                            |                           |                                      | Yes                            |

**Table S6. Sequences of oligonucleotides used in this study**

## Primer sequences for mutagenesis

| Mutation                         | Forward primer sequence (5'-3')                   | Reverse primer sequence (5'-3')            |
|----------------------------------|---------------------------------------------------|--------------------------------------------|
| E1045Q                           | AAGCGTTAATAGGAGCTGTTTACT<br>TGGAGGGAAG            | GAAAACAATTGGCCATTGCATGTCGAAG<br>GTCCG      |
| E1222Q                           | AATCATTTATTGCAGCGCTGTACA<br>TTGATAAGGATTTGGAATATG | GCAAAAGGTCCGCCAAGGTCTTGGTGCG<br>AAG        |
| Synonymous<br>mutation T438-L444 | GAGAGATCTGTATGACAAATTTGA<br>GGAGGAGTTGGGGAGC      | AATCGTGATGTTCCAACCACTGTAGAATC<br>TCCCACCTG |

## Primer sequences for real-time RT-PCR

| Gene/Amplicon      | Forward primer sequence (5'-3') | Reverse primer sequence (5'-3') |
|--------------------|---------------------------------|---------------------------------|
| Human DLEU2        | TGCATTGGAACATGACATGAG           | AAGAATTGCTGAGCTAAGTAGAGGTC      |
| Human C13orf25     | GGCCTCCGGTTCGTAGTAAAG           | GCAGTTAGGTCCACGTGTATGA          |
| Human pri-miR-15a  | TAGGCGGAATGTGTGTTTA             | TGCTATCATAAGAGCTATGAATAAAAAG    |
| Human pri-miR-16-1 | CTTTTTATTCATAGCTCTTATGATAGC     | TCAATAAAACTGAAAACACATTAGTAACA   |
| Human pri-miR-17   | CACCTTGTA AAAACTGAAGATTGTGA     | CCTGCACTTTAAAGCCCAACT           |
| Human pri-miR-18a  | AGGGCCTGCTGATGTTGAGT            | AACACCTATATACTTGCTTGGCTTG       |
| 18S rRNA           | GTAACCCGTTGAACCCCAT             | CCATCCAATCGGTAGTAGCG            |

## Primer sequences for RACE in Fig S5

| Amplicon                  | Forward primer sequence (5'-3') | Reverse primer sequence (5'-3') |
|---------------------------|---------------------------------|---------------------------------|
| 5'RACE from exon A        | CGACTGGAGCACGAGGACACTGA         | CGCTCGCCTGACAGCTGATG            |
| Nested 5'RACE from exon A | GGACACTGACATGGACTGAAGGAGTA      | GCAGGAGGAGGAGGGGAGAA            |
| 3'RACE from exon B        | ATCCCTCCCTGTCACACACG            | GCTGTCAACGATACGCTACGTAACG       |
| Nested 3'RACE from exon B | GATGGGTGGTCGCTTACCTGTG          | CGCTACGTAACGGCATGACAGTG         |
| 5'RACE from exon C        | CGACTGGAGCACGAGGACACTGA         | TGCTCTAAAGTCTGCTCCCAGAGAGG      |
| Nested 5'RACE from exon C | GGACACTGACATGGACTGAAGGAGTA      | CTGCTCCCAGAGAGGACTTGT           |
| 3'RACE from exon D        | TGGCGCCACTTTCCTGAGAT            | GCTGTCAACGATACGCTACGTAACG       |
| Nested 3'RACE from exon D | ACTTCCAGCCAGTTGGGTCA            | CGCTACGTAACGGCATGACAGTG         |

## Primer sequences for RACE in Fig S10

| Amplicon                  | Forward primer sequence (5'-3') | Reverse primer sequence (5'-3') |
|---------------------------|---------------------------------|---------------------------------|
| 5'RACE from exon A        | CGACTGGAGCACGAGGACACTGA         | CCACACGCACCTCCTGGTTG            |
| Nested 5'RACE from exon A | GGACACTGACATGGACTGAAGGAGTA      | TGTCTTGGTTCTGTCTGTCTGATG        |
| 5'RACE from exon D        | CGACTGGAGCACGAGGACACTGA         | AAACCTGCTTCCATCTTGTTAGGC        |
| Nested 5'RACE from exon D | GGACACTGACATGGACTGAAGGAGTA      | GGCTAATATCTTCAAATCATCCACAG      |

|                           |                            |                      |
|---------------------------|----------------------------|----------------------|
| 5'RACE from exon E        | CGACTGGAGCACGAGGACACTGA    | GTGGCACCATCCCGAGCAAG |
| Nested 5'RACE from exon E | GGACACTGACATGGACTGAAGGAGTA | AGAGCTCTCAGTGCCTAGG  |

Primer sequences for RACE in Fig S12

| <b>Amplicon</b>           | <b>Forward primer sequence (5'-3')</b> | <b>Reverse primer sequence (5'-3')</b> |
|---------------------------|----------------------------------------|----------------------------------------|
| 5'RACE from exon A        | CGACTGGAGCACGAGGACACTGA                | AGGCCCTCAGCTAGCGGTCTG                  |
| Nested 5'RACE from exon A | GGACACTGACATGGACTGAAGGAGTA             | GGTCTGAGTCCTGGGTTCCAAA                 |
| 5'RACE from exon B        | CGACTGGAGCACGAGGACACTGA                | CGGAGGATGGAGGCGTCTTCT                  |
| Nested 5'RACE from exon B | GGACACTGACATGGACTGAAGGAGTA             | CCAAAGCCAGGAAGTGAAAATGA                |
| 5'RACE from exon C        | CGACTGGAGCACGAGGACACTGA                | AAATGCGGCCACACGGACTTT                  |
| Nested 5'RACE from exon C | GGACACTGACATGGACTGAAGGAGTA             | GGCCACACGGACTTTGAAGG                   |

Primer sequences for RT-PCR

| <b>Primer name</b> | <b>Primer sequence (5'-3')</b> |
|--------------------|--------------------------------|
| 507                | GAGTAGGCGCGTGGAGTC             |
| 508                | TCTTGCACGATCAAATAGGG           |
| 509                | GCCACATGTGATAGATGACCA          |
| 510                | GGGTGATCCTTTGCCTTCT            |
| 511                | CAGGCAGGACGAGAGAAAGA           |
| 513                | TGCAATGTAAGCTTCTGTTTCC         |
| 514                | GGGGAGAGGATGGAGAGC             |
| 515                | TCATTTTCTCCGCAGCATC            |
| 517                | CGAGCTCAGTTATGGCACAC           |
| 518                | GGGAGTCTAAGGGCAGCAG            |
| 519                | TGCTGCTGCTGCTGCTAC             |
| 520                | TAGCGGGAAGAACAAGGAA            |
| 521                | GGGACGCTGGAGTCTGG              |
| 522                | TTCTGGTGGCTGCATTACTCT          |
| 523                | GGAGAGAGGAAGAGCGGAGT           |
| 524                | AAAGGCGCTTCTTTTACCT            |
| 525                | CCTGTCAGTCACCGTGTCC            |
| 552                | AAGAGGGTGAGCGTTTGGGA           |
| 553                | CCAGGGACGTCATTTTCACT           |
| 554                | CCCTTCAAAGTCCGTGTGG            |
| 555                | GGTGGCTAGGTGACAGGAGA           |
| 556                | GGGTGACTTTCTCGACTCGT           |
| 557                | CTGGCCCATGTCTCTCTGTT           |
| 559                | CAAGACATCTGAGGGGCAAC           |
| 560                | GCAGAGGAGGTGTCTTCAGG           |
| 561                | CACTAGTGTCTCCCTGCTTC           |
| 563                | CAGCCTAGCGCACTGAGAG            |
| 565                | GTCCTCTCTGGGAGCAGACTT          |
| 566                | TTTGAACCATGAATTCCACCT          |
| 575                | TCTTTGGACAAAATTGAGAAGAACT      |

**Table S7. Transfection methods.**

| <b>Cell lines</b>            | <b>Transfection reagent</b>                               | <b>Molar Ratio of plasmids transfected*</b> |
|------------------------------|-----------------------------------------------------------|---------------------------------------------|
| A-172                        | Cell Line Kit V; Program U-029; Nucleofector 2b (Amaxa)   | 3:1                                         |
| A-673                        | Cell Line Kit V; Program X-001; Nucleofector 2b (Amaxa)   | 3:1                                         |
| C2C12                        | Cell Line Kit V; Program B-032; Nucleofector 2b (Amaxa)   | 3:1                                         |
| CT-26                        | Cell Line Kit SE; Program CM-137; 4D-Nucleofector (Amaxa) | 3:1                                         |
| E14TG2a embryonic stem cells | Xfect (Clontech)                                          | 3:1                                         |
| HCT116                       | FuGENE HD (Promega)                                       | 2:1                                         |
| HEK293T                      | FuGENE HD (Promega)                                       | 1:1                                         |
| Hepa1-6                      | Cell Line Kit SF; Program EH-100; 4D-Nucleofector (Amaxa) | 3:1                                         |
| HepG2                        | FuGENE HD (Promega)                                       | 3:1                                         |
| Human primary fibroblasts    | FuGENE HD (Promega)                                       | 3:1                                         |
| MCF-7                        | Lipofectamine LTX (Life Technologies)                     | 4:1                                         |
| MEF                          | MEF Kit 2; Program T-020; Nucleofector 2b (Amaxa)         | 3:1                                         |
| Neuro-2a                     | Cell Line Kit V; Program T-024; Nucleofector 2b (Amaxa)   | 3:1                                         |
| NCCIT                        | FuGENE HD (Promega)                                       | 4:1                                         |

\*Molar ratio of pcDNA3.1/V5-His-TN-DROSHA to pcDNA5/FLAG-HA-DGCR8
